# Supplementary material
Source: PubMed Central journal article supplement (PMC10922009)
Supplement: NIHMS1624660-supplement-1.pdf [file NIHMS1624660-supplement-1.pdf]

**Online Supplement**1. Random Intercept Cross-Lagged Panel Model (final model): Code

```
variable: names = PATNO WAI_C_R1-WAI_C_R5 WAI_C_A1-WAI_C_A5 WAI_C1-
WAI_C5 BDI1-BDI5 ;
```

```
missing = .;
```

```
usevar= WAI_C1-WAI_C4 BDI1-BDI5 ;
```

```
output: modindices(5) STDYX cinterval;
```

```
model:
```

```
! Random intercepts
```

```
RI_WAI_C BY WAI_C1-WAI_C4@1;
```

```
RI_BDI BY BDI1-BDI5@1;
```

```
! Within-person variables
```

```
wWAI_C1 BY WAI_C1@1;
```

```
wWAI_C2 BY WAI_C2@1;
```

```
wWAI_C3 BY WAI_C3@1;
```

```
wWAI_C4 BY WAI_C4@1;
```

```
wBDI1 BY BDI1@1;
```

```
wBDI2 BY BDI2@1;
```

```
wBDI3 BY BDI3@1;
```

```
wBDI4 BY BDI4@1;
```

```
wBDI5 BY BDI5@1;
```

```
! Constrain the measurement error variances to zero
```

```
WAI_C1-BDI5@0;
```

```
! Autoregressions
```

```
wWAI_C2-wWAI_C4 pon wWAI_C1-wWAI_C3 (A);
```

```
wBDI2-wBDI5 pon wBDI1-wBDI4 (B);
```

```
!Cross-lagged effects
```

```
wWAI_C1-wWAI_C4 pon wBDI1-wBDI4 (C);
```

```
wBDI2-wBDI5 pon wWAI_C1-wWAI_C4 (D);
```

```
! Covariances
```

```
wWAI_C1 WITH wBDI1;
```

```
wWAI_C2-wWAI_C4 pwith wBDI2-wBDI4 (E);
```

## THE ALLIANCE-OUTCOME RELATIONSHIP

27

! Fix the correlation between exogenous vars to zero

RI\_WAI\_C WITH wWAI\_C1@0 wBDI1@0;

RI\_BDI WITH wWAI\_C1@0 wBDI1@0;

!Constrain the means of WAI to be equal

[WAI\_C1 WAI\_C2 WAI\_C3 WAI\_C4] (F);

## THE ALLIANCE-OUTCOME RELATIONSHIP

28

2. Latent Curve Model with Structured Residuals: Code

```
variable: names = PATNO WAI_C_R1-WAI_C_R5 WAI_C_A1-WAI_C_A5 WAI_C1-
WAI_C5 BDI1-BDI5 ;
```

```
missing = .;
```

```
usevar= WAI_C1-WAI_C4 BDI1-BDI5;
```

```
output: STDYX modindices(5) cinterval;
```

```
model:
```

```
! Random intercepts
```

```
RI_WAI_C BY WAI_C1-WAI_C4@1;
```

```
RI_BDI BY BDI1-BDI5@1;
```

```
!Trends
```

```
SLOPE_W BY WAI_C1@0;
```

```
SLOPE_W BY WAI_C2@1;
```

```
SLOPE_W BY WAI_C3@2;
```

```
SLOPE_W BY WAI_C4@3;
```

```
SLOPE_B BY BDI1@0;
```

```
SLOPE_B BY BDI2@1;
```

```
SLOPE_B BY BDI3@2;
```

```
SLOPE_B BY BDI4@3;
```

```
SLOPE_B BY BDI5@4;
```

```
! Within-person variables
```

```
wWAI_C1 BY WAI_C1@1;
```

```
wWAI_C2 BY WAI_C2@1;
```

```
wWAI_C3 BY WAI_C3@1;
```

```
wWAI_C4 BY WAI_C4@1;
```

```
wBDI1 BY BDI1@1;
```

```
wBDI2 BY BDI2@1;
```

```
wBDI3 BY BDI3@1;
```

```
wBDI4 BY BDI4@1;
```

```
wBDI5 BY BDI5@1;
```

```
! Constrain the measurement error variances to zero
```

```
WAI_C1-BDI5@0;
```

## THE ALLIANCE-OUTCOME RELATIONSHIP

29

! Autoregressions

wWAI\_C2-wWAI\_C4 pon wWAI\_C1-wWAI\_C3 (A);  
wBDI2-wBDI5 pon wBDI1-wBDI4 (B);

!Cross-lagged effects

wWAI\_C1-wWAI\_C4 pon wBDI1-wBDI4 (C);  
wBDI2-wBDI5 pon wWAI\_C1-wWAI\_C4 (D);

! Covariances

wWAI\_C1 WITH wBDI1;  
wWAI\_C2-wWAI\_C4 pwith wBDI2-wBDI4 (E);

! Fix the correlation between exogenous vars to zero

RI\_WAI\_C WITH wWAI\_C1@0 wBDI1@0;  
RI\_BDI WITH wWAI\_C1@0 wBDI1@0;

!fix the means of residuals to zero;

[wWAI\_C1-wWAI\_C4@0];  
[wBDI1-wBDI5@0];
